# Supplementary material for: Enhanced protein fold recognition through a novel data integration approach
Source: Springer Nature journal article supplement (doi:10.1186/1471-2105-10-267), 2009-08-26
Supplement: 12859_2009_2997_MOESM2_ESM.pdf [file 12859_2009_2997_MOESM2_ESM.pdf]

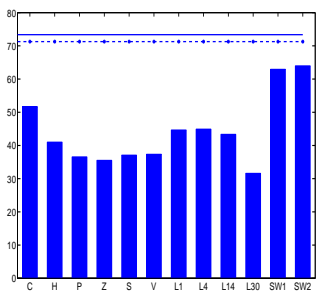

(a)

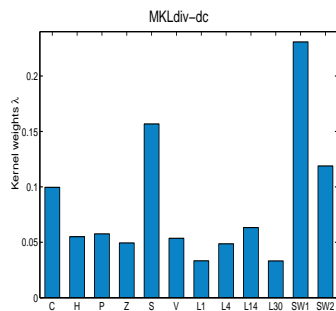

(b)

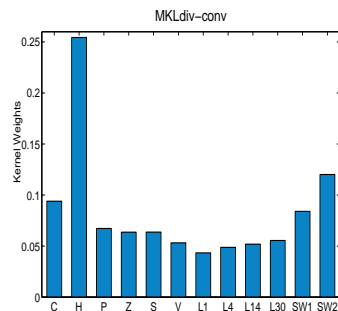

(c)

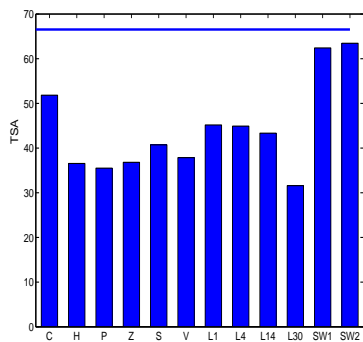

(d)

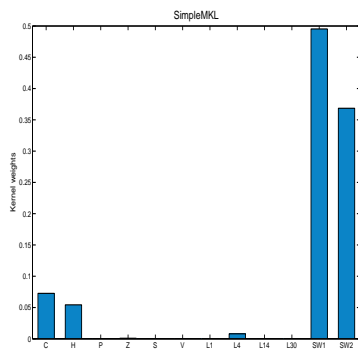

(e)

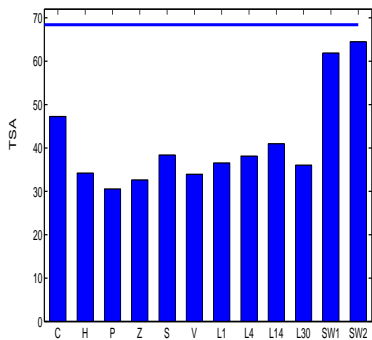

(f)

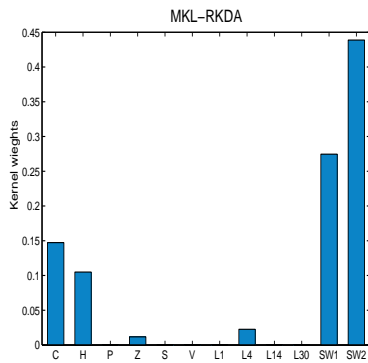

(g)
